# Supplementary material for: Understanding the relationship between suicide-related stigma and suicidal thoughts through the lens of the Integrated Motivational- Volitional (IMV) model of suicide
Source: Research Square preprint supplement (doi:10.21203/rs.3.rs-7254280/v1), 2025-08-22
Supplement: Supplementary file 1 [file 12b90025c45e60f06418b519.docx]

Supplementary material 1.

*Table 1.* Means and Standard deviations for each measure included within the analysis.

| **Measure** | **Mean** | **Standard deviation** |
| --- | --- | --- |
| Entrapment | 8 | 5.05 |
| Defeat | 7.3 | 4.36 |
| SIDAS | 12.24 | 12.8 |
| Stigma subscale | 8.67 | 2.99 |
| Isolation subscale | 16.23 | 3.15 |
| Glorification subscale | 11.78 | 3.27 |
| Stigma towards suicide attempts (STOSA) | 31.82 | 6.51 |
| Stigma towards suicide and suicide survivors (STOSASS) | 35.71 | 7.33 |
